# Supplementary material for: Chemical Bonding in Homoleptic Carbonyl Cations [M{Fe(CO)5}2]+ (M=Cu, Ag, Au)
Source: PubMed Central journal article supplement — Chemistry. 2021 Mar 16;27(23):6936–44. doi: 10.1002/chem.202004041 (PMC8252735; doi:10.1002/chem.202004041), 2021-03-16
Supplement: CHEM-27-6936-s001.pdf [file CHEM-27-6936-s001.pdf]

# Chemistry–A European Journal

Supporting Information

## Chemical Bonding in Homoleptic Carbonyl Cations $[M\{Fe(CO)_5\}_2]^+$ (M = Cu, Ag, Au)

Sudip Pan,<sup>[a, b]</sup> Sai Manoj N. V. T. Gorantla,<sup>[b]</sup> Devaborniny Parasara,<sup>[c]</sup> H. V. Rasika Dias,<sup>\*, [c]</sup> and Gernot Frenking<sup>\*, [a, b]</sup>

**Theoretical Methods**

**Experimental Methods**

**Figures S1 and S2**

**Tables S1 and S2**

**Additional X-ray data**

**Figures S3-S5**

**Tables S3-S5**

**References**

## Theoretical Methods

The geometry optimization followed by the vibrational frequencies calculations were performed at the BP86-D3(BJ)/def2-TZVPP level.<sup>[1]</sup> All calculated complexes are minima on the potential energy surfaces as understood by the absence of any imaginary frequency. All these calculations were carried out with Gaussian 16 program package.<sup>[2]</sup> The natural bond orbital (NBO) analysis<sup>[3]</sup> were performed to evaluate the partial charge using NBO 6.0 program.<sup>[4]</sup> The quantum theory of atoms in molecules analysis<sup>[5]</sup> was done with the AIMALL program<sup>[6]</sup> at the BP86-D3(BJ)/def2TZVPP/x2C-TZVPall<sup>[7]</sup> where all-electron x2C-TZVPall basis set was used for Ag and Au atoms.

The bonding situations were analyzed by means of an energy decomposition analysis (EDA)<sup>[8]</sup> together with the natural orbitals for chemical valence (NOCV)<sup>[9]</sup> method by using the ADF 2018.105 program package.<sup>[10]</sup> The EDA-NOCV calculations were carried out at the BP86-D3(BJ)/TZ2P-ZORA level<sup>[11]</sup> using the BP86-D3(BJ)/def2-TZVPP optimized geometries. In this analysis, the intrinsic interaction energy ( $\Delta E_{\text{int}}$ ) between two fragments can be divided into three energy components as follows:

$$\Delta E_{\text{int}} = \Delta E_{\text{elstat}} + \Delta E_{\text{Pauli}} + \Delta E_{\text{orb}} + \Delta E_{\text{disp}} \quad (1)$$

While the electrostatic  $\Delta E_{\text{elstat}}$  term represents the quasiclassical electrostatic interaction between the unperturbed charge distributions of the prepared fragments, the Pauli repulsion  $\Delta E_{\text{Pauli}}$  corresponds to the energy change associated with the transformation from the superposition of the unperturbed electron densities of the isolated fragments to the wavefunction, which properly obeys the Pauli principle through explicit antisymmetrization and renormalization of the production wavefunction. Since we included D3(BJ), it provides us with the dispersion interaction energy between two interacting fragments. The orbital term  $\Delta E_{\text{orb}}$  is originated from the mixing of orbitals, charge transfer and polarization between the isolated fragments, which can be further decomposed into contributions from each irreducible representation of the point group of the interacting system as follows:

$$\Delta E_{\text{orb}} = \sum_r \Delta E_r \quad (2)$$

The combination of the EDA with NOCV enables the partition of the total orbital interactions into pairwise contributions of the orbital interactions which is very vital to get a

complete picture of the bonding. The charge deformation  $\Delta\rho_k(r)$ , resulting from the mixing of the orbital pairs  $\psi_k(r)$  and  $\psi_{-k}(r)$  of the interacting fragments presents the amount and the shape of the charge flow due to the orbital interactions (Equation 3), and the associated energy term  $\Delta E_{orb}$  provides with the size of stabilizing orbital energy originated from such interaction (Equation 4).

$$\Delta\rho_{orb}(r) = \sum_k \Delta\rho_k(r) = \sum_{k=1}^{N/2} v_k [-\psi_{-k}^2(r) + \psi_k^2(r)] \quad (3)$$

$$\Delta E_{orb} = \sum_k \Delta E_k^{orb} = \sum_{k=1}^{N/2} v_k [-F_{-k,-k}^{TS} + F_{k,k}^{TS}] \quad (4)$$

More details about the EDA-NOCV method and its application are given in recent reviews articles.<sup>[12]</sup>

## Experimental Methods

### Experimental Procedures

All manipulations were carried out under an atmosphere of purified nitrogen using standard Schlenk techniques. Solvents were purchased from commercial sources and purified by conventional methods prior to use. Glassware was oven-dried at 150°C overnight. IR spectra were collected at room temperature on a Shimadzu IRPrestige-21 FT-IR containing an ATR attachment at 2 cm<sup>-1</sup> resolution. The AgSbF<sub>6</sub> was purchased from Sigma-Aldrich Company and was used as received. Fe(CO)<sub>5</sub> was obtained from Sigma-Aldrich Company and distilled prior to use. The [M{Fe(CO)<sub>5</sub>}<sub>2</sub>][SbF<sub>6</sub>] (M = Cu, Ag, Au) compounds have been prepared following reported procedures.<sup>13</sup>

**[Cu{Fe(CO)<sub>5</sub>}<sub>2</sub>][SbF<sub>6</sub>]:** The CuBr (0.150 g, 1.05 mmol) and AgSbF<sub>6</sub> (0.361 g, 1.05 mmol) were placed in a flask with a magnetic stir bar. Dichloromethane (~12 mL) saturated with ethylene, and this solution was added to the mixture at room temperature. The mixture was stirred for about 3 hours under ethylene atmosphere. Ethylene was gently bubbled into the mixture (3 x 5 min) during this period to maintain an ethylene rich solution. A yellow-greenish precipitate (AgBr) was formed over time, which was removed by filtration through Celite. The resulting solution of [Cu(C<sub>2</sub>H<sub>4</sub>)<sub>3</sub>][SbF<sub>6</sub>] was concentrated to about 3 mL using ethylene. A yellow solution of Fe(CO)<sub>5</sub> (0.514 g, 2.63 mmol) in dichloromethane (1 mL) was added dropwise to [Cu(C<sub>2</sub>H<sub>4</sub>)<sub>3</sub>][SbF<sub>6</sub>] (considering 100% conversion) solution at -70 °C. The resulting pale-yellow solution was stirred for ~15 mins, and hexane (~2 mL) was added. Finally, the solution was filtered and kept at -20 °C overnight to obtain [Cu{Fe(CO)<sub>5</sub>}<sub>2</sub>][SbF<sub>6</sub>] as colorless crystals. ATR-IR (single crystals, ν<sub>CO</sub>, cm<sup>-1</sup>): 2131 (m), 2084 (m sh), 2031 (vs), 1997 (s).

**[Ag{Fe(CO)<sub>5</sub>}<sub>2</sub>][SbF<sub>6</sub>]:** A yellow solution of Fe(CO)<sub>5</sub> (0.284 g, 1.45 mmol) in dichloromethane (1-2 mL) was added dropwise to AgSbF<sub>6</sub> (200 mg, 0.58 mmol) in dichloromethane (~6 mL) at -70 °C. The resulting pale-yellow solution was stirred for 10 min and kept at -20 °C overnight to obtain [Ag{Fe(CO)<sub>5</sub>}<sub>2</sub>][SbF<sub>6</sub>] as colorless crystals. ATR-IR (single crystals, cm<sup>-1</sup>): 2127, 2051, 2016. The [Ag{Fe(CO)<sub>5</sub>}<sub>2</sub>][SbF<sub>6</sub>] can also be isolated from

in-situ generated  $[\text{Ag}(\text{C}_2\text{H}_4)_3][\text{SbF}_6]$  and  $\text{Fe}(\text{CO})_5$ .  $\text{AgSbF}_6$  (0.120 g, 0.35 mmol) was placed in a flask with a magnetic stir bar. Dichloromethane (~10 mL) saturated with ethylene was added to the mixture at room temperature. The mixture was stirred for about 2 hours under ethylene atmosphere. Ethylene was gently bubbled into the mixture (3 x 4 min) during this period to maintain an ethylene rich solution. The resulting solution of  $[\text{Ag}(\text{C}_2\text{H}_4)_3][\text{SbF}_6]$  was concentrated to about 3 mL by bubbling ethylene, and then slowly cooled down to  $-70\text{ }^\circ\text{C}$ . A solution of  $\text{Fe}(\text{CO})_5$  (0.171 g, 0.88 mmol, calculated considering 100% conversion of  $\text{AgSbF}_6$  to  $[\text{Ag}(\text{C}_2\text{H}_4)_3][\text{SbF}_6]$ ) in dichloromethane (1-2 mL) was added to it dropwise. The resulting reaction mixture was stirred for ~10 min and kept in refrigerator at  $-20\text{ }^\circ\text{C}$  to obtain  $[\text{Ag}\{\text{Fe}(\text{CO})_5\}_2][\text{SbF}_6]$  as colorless crystals. The complex can be isolated as crystalline white solid (by purging with nitrogen). Upon exposure to air the white solid becomes sticky, and slowly changes color to black. ATR-IR (single crystals,  $\nu_{\text{CO}}$ ,  $\text{cm}^{-1}$ ): 2127 (m), 2051 (s), 2016 (vs).

**$[\text{Au}\{\text{Fe}(\text{CO})_5\}_2][\text{HOB}\{3,5\text{-(CF}_3)_2\text{C}_6\text{H}_3\}_3]$ :**  $\text{AuCl}$  (0.100 g, 0.43 mmol) and  $\text{Na}[\text{B}\{3,5\text{-(CF}_3)_2\text{C}_6\text{H}_3\}_4]$  (0.381 g, 0.43 mmol) were placed in a flask with a magnetic stir bar. Dichloromethane (~10 mL) saturated with ethylene was added to the mixture at room temperature. The mixture was stirred for about 3 hours under ethylene atmosphere. Ethylene was gently bubbled into the mixture (3 x 5 min) during this period to maintain an ethylene rich solution. A precipitate ( $\text{NaCl}$ ) was formed over time, which was removed by filtration through Celite. The resulting filtrate was concentrated to ~3 mL by bubbling ethylene. A yellow solution of  $\text{Fe}(\text{CO})_5$  (0.211 g, 1.08 mmol) in dichloromethane (1-2 mL) was added dropwise to  $\text{Au}(\text{C}_2\text{H}_4)_3[\text{B}\{3,5\text{-(CF}_3)_2\text{C}_6\text{H}_3\}_4]$  (considering 100 % conversion) solution at  $-70\text{ }^\circ\text{C}$ . The resulting black solution was stirred for ~10 mins and mixed with some hexane and kept in refrigerator at  $-20\text{ }^\circ\text{C}$ . A white powder was obtained,  $[\text{Au}\{\text{Fe}(\text{CO})_5\}_2][\text{B}\{3,5\text{-(CF}_3)_2\text{C}_6\text{H}_3\}_4]$ . ATR-IR (solid powder,  $\nu_{\text{CO}}$ ,  $\text{cm}^{-1}$ ): 2133 (m), 2084 (vs), 2070 (s), 2053 (vs). The mixture was filtered while maintaining the cold temperature and the filtrate was kept in a cold freezer ( $-20\text{ }^\circ\text{C}$ ) to obtain crystals of  $[\text{Au}\{\text{Fe}(\text{CO})_5\}_2][\text{HOB}\{3,5\text{-(CF}_3)_2\text{C}_6\text{H}_3\}_3]$ . ATR-IR (single crystals,  $\nu_{\text{CO}}$ ,  $\text{cm}^{-1}$ ): 2131 (m), 2069 (vs).

## Summary of IR data

|                                                                                                                                       | $\bar{\nu}_{\text{CO}}$ (cm <sup>-1</sup> ) |
|---------------------------------------------------------------------------------------------------------------------------------------|---------------------------------------------|
| <b>Cu{Fe(CO)<sub>5</sub>}<sub>2</sub>FSbF<sub>5</sub></b>                                                                             | 2131 (m), 2084 (m, sh), 2031 (vs), 1997 (s) |
| <b>[Ag{Fe(CO)<sub>5</sub>}<sub>2</sub>][SbF<sub>6</sub>]</b>                                                                          | 2127 (m), 2051 (s), 2016 (vs)               |
| <b>[Au{Fe(CO)<sub>5</sub>}<sub>2</sub>][SbF<sub>6</sub>] – powder and micro crystals</b>                                              | 2128 (m) , 2060 (vs br), 2037 (vs)          |
| <b>[Au{Fe(CO)<sub>5</sub>}<sub>2</sub>][B{3,5-(CF<sub>3</sub>)<sub>2</sub>C<sub>6</sub>H<sub>3</sub>}<sub>4</sub>] – solid powder</b> | 2133 (m), 2084 (vs), 2070 (s), 2053 (vs)    |
| <b>[Au{Fe(CO)<sub>5</sub>}<sub>2</sub>][HOB{3,5-(CF<sub>3</sub>)<sub>2</sub>C<sub>6</sub>H<sub>3</sub>}<sub>3</sub>] - crystals</b>   | 2131 (m), 2069 (s)                          |
| <b>Free Fe(CO)<sub>5</sub></b>                                                                                                        | 2024, 2000                                  |

## X-ray Data Collection and Structure Determinations

A suitable crystal covered with a layer of hydrocarbon/Paratone-N oil was selected and mounted on a Cryo-loop, and immediately placed in the low temperature nitrogen stream. The X-ray intensity data were measured at 100(2) K (unless otherwise noted) on a Bruker D8 Quest with a Photon 100 CMOS detector equipped with an Oxford Cryosystems 700 series cooler, a Triumph graphite monochromator, and a Mo K $\alpha$  fine-focus sealed tube ( $\lambda = 0.71073$  Å). Intensity data were processed using the Bruker Apex program suite. Absorption corrections were applied by using SADABS.<sup>14</sup> Initial atomic positions were located by SHELXT,<sup>15</sup> and the structures of the compounds were refined by the least-squares method using SHELXL<sup>16</sup> within Olex2 GUI.<sup>17</sup> All the non-hydrogen atoms were refined anisotropically. The H atoms were included in their calculated positions and refined as riding on the atoms to which they are joined. X-ray structural figures were generated using Olex2.<sup>17</sup> The CCDC 1999550, 1999551 and 2027017 contain the supplementary crystallographic data for these molecules.

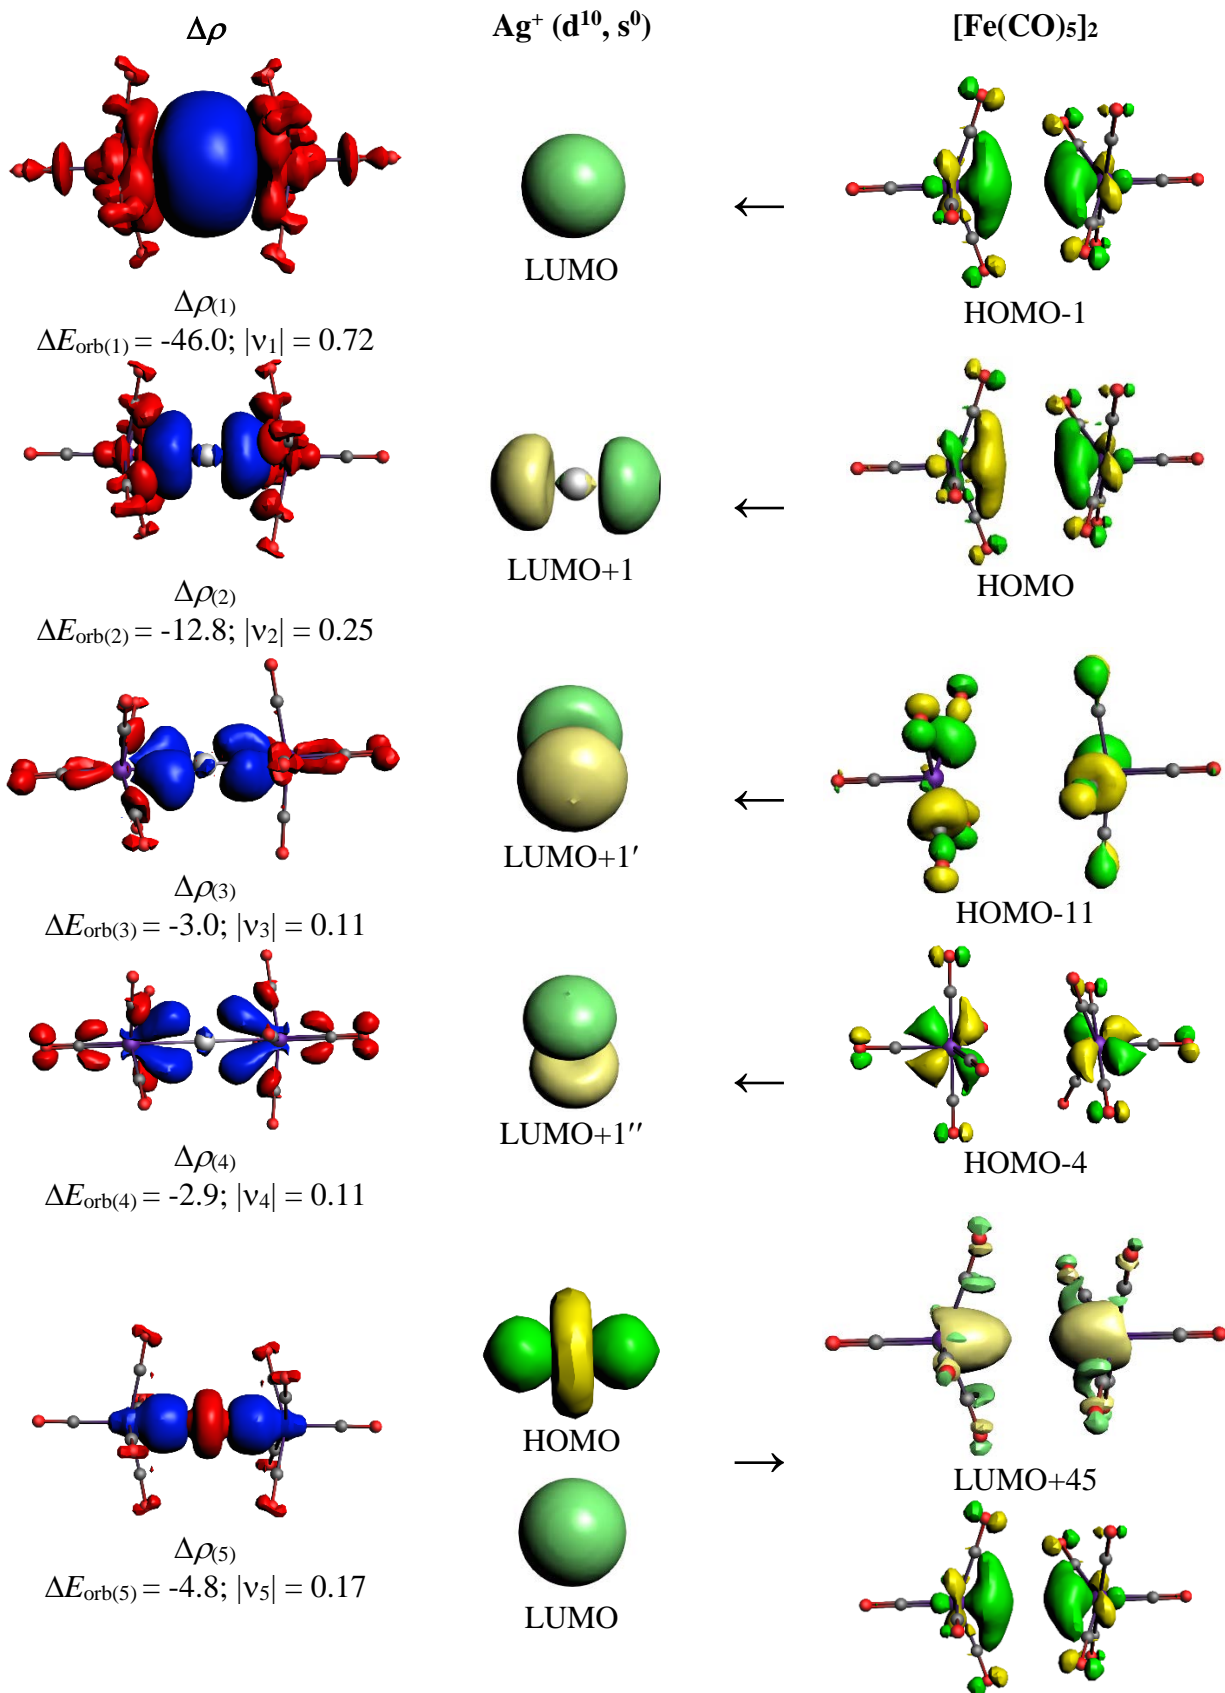



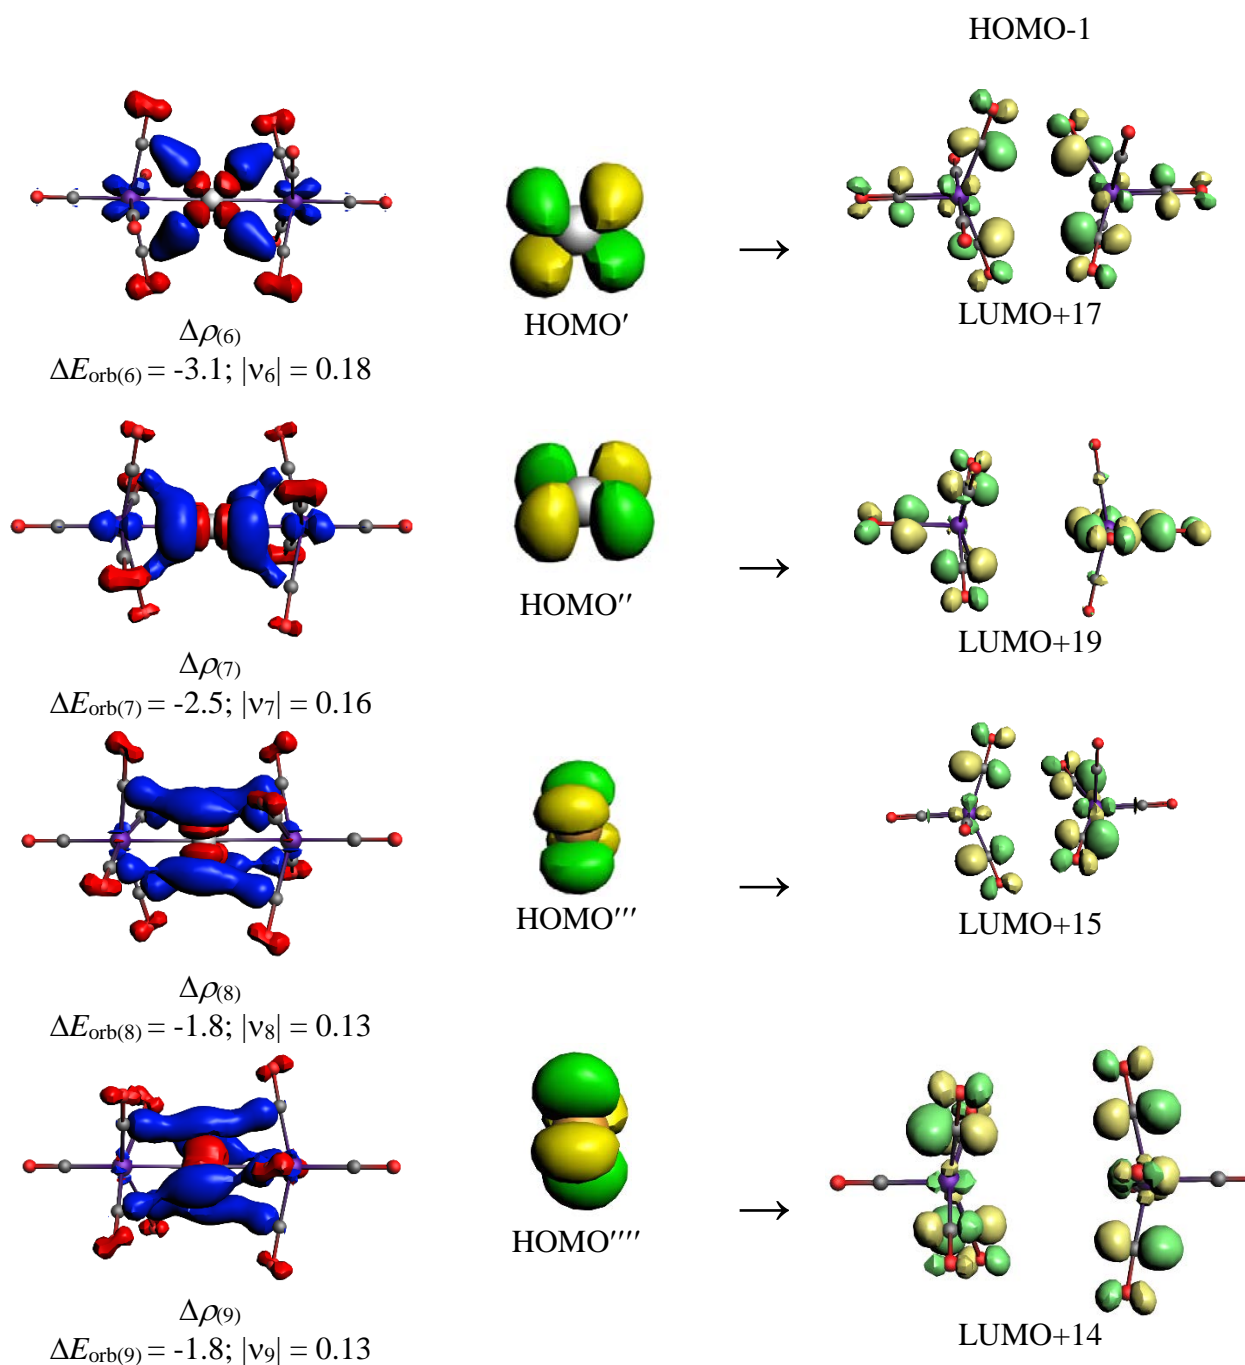

**Figure S1.** The shape of the deformation densities,  $\Delta\rho_{(1)-(9)}$  which are associated with  $\Delta E_{\text{orb}(1)-(9)}$ , and the most important associated fragment orbitals for  $[\text{Ag}\{\text{Fe}(\text{CO})_5\}_2]^+$  at the BP86-D3(BJ)/TZ2P-ZORA//BP86-D3(BJ)/def2-TZVPP level. The isovalue is 0.0004 au for  $\Delta\rho_{(1)-(2)}$  and 0.0002 au for the rest. The eigenvalues  $v$  give the size of the charge migration. The direction of the charge flow of the deformation densities is red→blue.

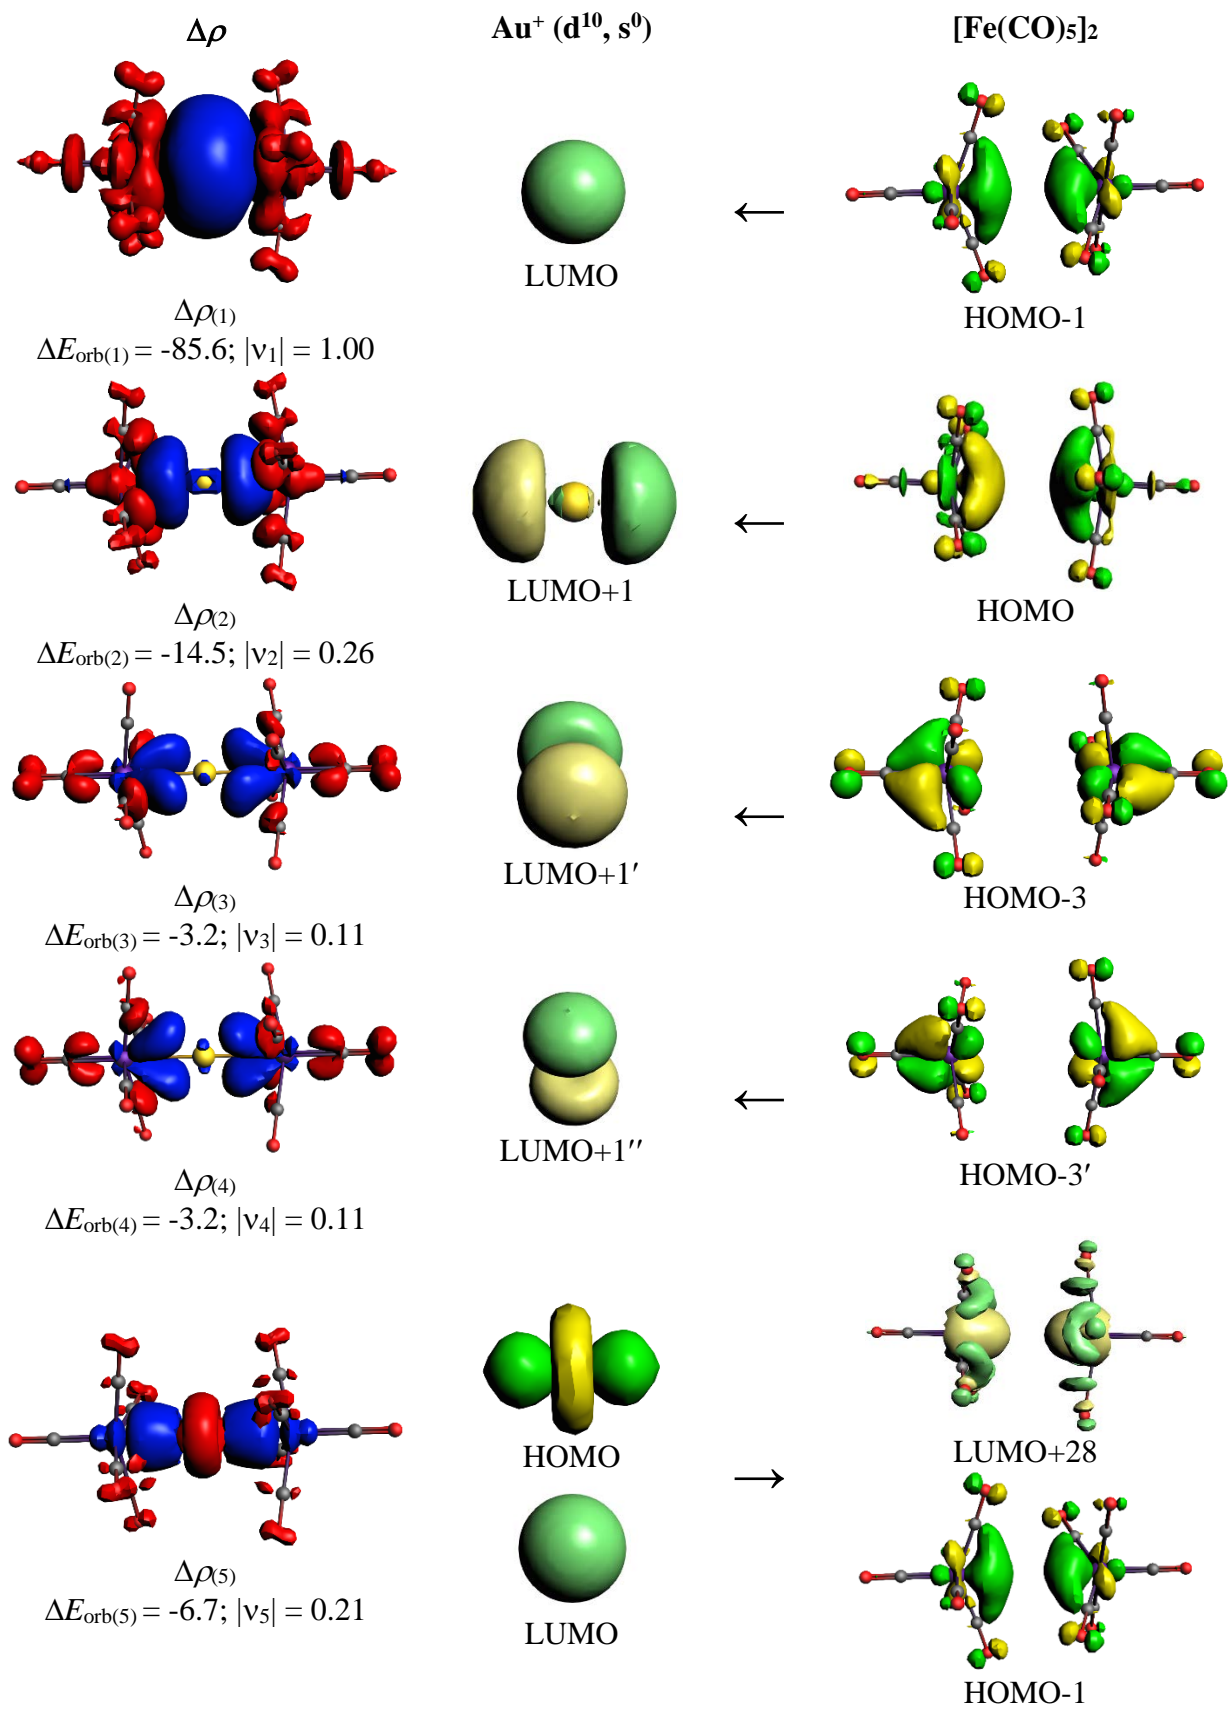

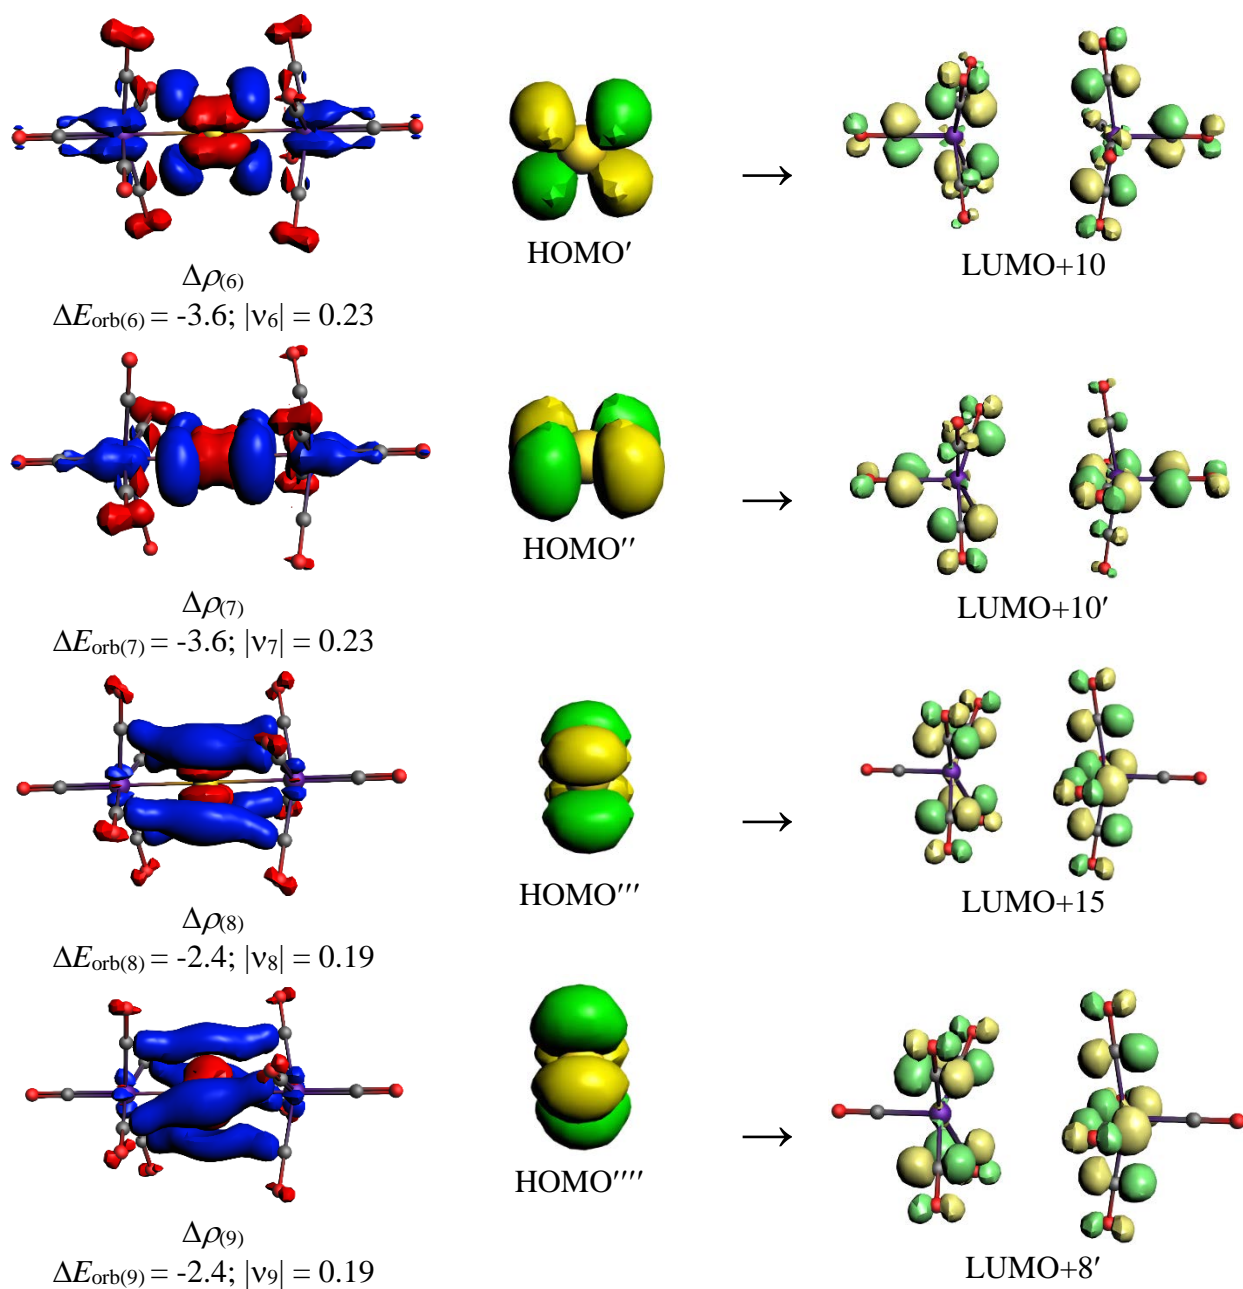

**Figure S2.** The shape of the deformation densities,  $\Delta\rho_{(1)-(9)}$  which are associated with  $\Delta E_{\text{orb}(1)-(9)}$ , and the most important associated fragment orbitals for  $[\text{Au}\{\text{Fe}(\text{CO})_5\}_2]^+$  at the BP86-D3(BJ)/TZ2P-ZORA//BP86-D3(BJ)/def2-TZVPP level. The isovalue is 0.0004 au for  $\Delta\rho_{(1)-(2)}$  and 0.0002 au for the rest. The eigenvalues  $v$  give the size of the charge migration. The direction of the charge flow of the deformation densities is red→blue.

**Table S1.** Relative energies ( $E_{rel}$ , kcal/mol) of different conformations of  $[M\{Fe(CO)_5\}_2]^+$  ( $M = Cu, Ag, Au$ ) complexes at the BP86-D3(BJ)/def2-TZVPP level.

|                    | $E_{rel}$ , kcal/mol |                          |                     |
|--------------------|----------------------|--------------------------|---------------------|
|                    | $(D_2, ^1A)$         | $(D_4, ^1A_1)$           | $(D_{4d}, ^1A_1)$   |
| $Cu[Fe(CO)_5]_2^+$ | 0.0                  | 1.8 (43.6i, 36.6i, 8.6i) | 1.5 (45.6i, 45.6i)  |
| $Ag[Fe(CO)_5]_2^+$ | 0.0                  | 0.1 (10.9i, 8.2i, 4.3i)  | 0.01 (10.9i, 10.6i) |
| $Au[Fe(CO)_5]_2^+$ | -a-                  | 0.1 (3.8i)               | 0.0                 |

<sup>a</sup> $D_2$  structure collapse to the  $D_{4d}$  geometry during geometry optimization.

**Table S2.** Energies and coordinates of the calculated molecules at the BP86-D3(BJ)/def2-TZVPP level.

|                                                                                                                                                                                                                                                                                                                                                                                                                                                                                                                                                                                                                                                                                                                                                                                                                                                                                                                                                                                                                                                                                                                                                                         |
|-------------------------------------------------------------------------------------------------------------------------------------------------------------------------------------------------------------------------------------------------------------------------------------------------------------------------------------------------------------------------------------------------------------------------------------------------------------------------------------------------------------------------------------------------------------------------------------------------------------------------------------------------------------------------------------------------------------------------------------------------------------------------------------------------------------------------------------------------------------------------------------------------------------------------------------------------------------------------------------------------------------------------------------------------------------------------------------------------------------------------------------------------------------------------|
| <p>[Cu{Fe(CO)<sub>5</sub>}<sub>2</sub>]<sup>+</sup> (<i>D</i><sub>2</sub>, <sup>1</sup>A)</p> <p>E = -5302.621907 au</p> <p>1 1</p> <p>Fe 0.00000000 0.00000000 2.40131700</p> <p>O -2.41762400 1.41761500 1.40465500</p> <p>O -1.50259200 -2.56198900 2.41030300</p> <p>O 0.00000000 0.00000000 5.37106300</p> <p>O 1.50259200 2.56198900 2.41030300</p> <p>O 2.41762400 -1.41761500 1.40465500</p> <p>C -0.92444800 -1.57539500 2.40017900</p> <p>C -1.47287200 0.86319300 1.76108000</p> <p>C 0.00000000 0.00000000 4.22756800</p> <p>C 1.47287200 -0.86319300 1.76108000</p> <p>C 0.92444800 1.57539500 2.40017900</p> <p>Fe 0.00000000 0.00000000 -2.40131700</p> <p>O 2.41762400 1.41761500 -1.40465500</p> <p>O -1.50259200 2.56198900 -2.41030300</p> <p>O 0.00000000 0.00000000 -5.37106300</p> <p>O 1.50259200 -2.56198900 -2.41030300</p> <p>O -2.41762400 -1.41761500 -1.40465500</p> <p>C -0.92444800 1.57539500 -2.40017900</p> <p>C 1.47287200 0.86319300 -1.76108000</p> <p>C 0.00000000 0.00000000 -4.22756800</p> <p>C -1.47287200 -0.86319300 -1.76108000</p> <p>C 0.92444800 -1.57539500 -2.40017900</p> <p>Cu 0.00000000 0.00000000 0.00000000</p> |
| <p>[Cu{Fe(CO)<sub>5</sub>}<sub>2</sub>]<sup>+</sup> (<i>D</i><sub>4</sub>, <sup>1</sup>A<sub>1</sub>)</p> <p>E = -5302.618993 au</p> <p>1 1</p> <p>Fe 0.00000000 0.00000000 2.39522900</p> <p>O 0.02902300 2.92669800 1.89192800</p> <p>O -2.92669800 0.02902300 1.89192800</p> <p>O 0.00000000 0.00000000 5.37410700</p> <p>O 2.92669800 -0.02902300 1.89192800</p> <p>O -0.02902300 -2.92669800 1.89192800</p> <p>C -1.79626200 0.01778100 2.08381100</p> <p>C 0.01778100 1.79626200 2.08381100</p> <p>C 0.00000000 0.00000000 4.23173200</p>                                                                                                                                                                                                                                                                                                                                                                                                                                                                                                                                                                                                                         |

C -0.01778100 -1.79626200 2.08381100  
C 1.79626200 -0.01778100 2.08381100  
Fe 0.00000000 0.00000000 -2.39522900  
O 0.02902300 -2.92669800 -1.89192800  
O 2.92669800 0.02902300 -1.89192800  
O 0.00000000 0.00000000 -5.37410700  
O -2.92669800 -0.02902300 -1.89192800  
O -0.02902300 2.92669800 -1.89192800  
C 1.79626200 0.01778100 -2.08381100  
C 0.01778100 -1.79626200 -2.08381100  
C 0.00000000 0.00000000 -4.23173200  
C -0.01778100 1.79626200 -2.08381100  
C -1.79626200 -0.01778100 -2.08381100  
Cu 0.00000000 0.00000000 0.00000000

[Cu{Fe(CO)<sub>5</sub>}<sub>2</sub>]<sup>+</sup> (*D*<sub>4d</sub>, <sup>1</sup>A<sub>1</sub>)

E = -5302.619446 au

1 1

Fe 0.00000000 0.00000000 2.39028700  
O 0.00000000 2.92285800 1.86354100  
O -2.92285800 0.00000000 1.86354100  
O 0.00000000 0.00000000 5.36842000  
O 2.92285800 0.00000000 1.86354100  
O 0.00000000 -2.92285800 1.86354100  
C -1.79450800 0.00000000 2.06833400  
C 0.00000000 1.79450800 2.06833400  
C 0.00000000 0.00000000 4.22603300  
C 0.00000000 -1.79450800 2.06833400  
C 1.79450800 0.00000000 2.06833400  
Fe 0.00000000 0.00000000 -2.39028700  
O 2.06677300 -2.06677300 -1.86354100  
O 2.06677300 2.06677300 -1.86354100  
O 0.00000000 0.00000000 -5.36842000  
O -2.06677300 -2.06677300 -1.86354100  
O -2.06677300 2.06677300 -1.86354100  
C 1.26890900 1.26890900 -2.06833400  
C 1.26890900 -1.26890900 -2.06833400  
C 0.00000000 0.00000000 -4.22603300  
C -1.26890900 1.26890900 -2.06833400  
C -1.26890900 -1.26890900 -2.06833400  
Cu 0.00000000 0.00000000 0.00000000

[Ag{Fe(CO)<sub>5</sub>}<sub>2</sub>]<sup>+</sup> (*D*<sub>2</sub>, <sup>1</sup>A)

E = -3808.935510 au

1 1

Fe 0.00000000 0.00000000 2.59724600  
O -1.13661300 -2.72522900 2.27389300  
O 2.69301000 -1.12335600 2.03354500  
O 0.00000000 0.00000000 5.56831500  
O -2.69301000 1.12335600 2.03354500  
O 1.13661300 2.72522900 2.27389300  
C 1.65039300 -0.68824700 2.23316900  
C -0.69804400 -1.67348600 2.38994700  
C 0.00000000 0.00000000 4.42531400  
C 0.69804400 1.67348600 2.38994700  
C -1.65039300 0.68824700 2.23316900  
Fe 0.00000000 0.00000000 -2.59724600  
O -1.13661300 2.72522900 -2.27389300  
O -2.69301000 -1.12335600 -2.03354500  
O 0.00000000 0.00000000 -5.56831500  
O 2.69301000 1.12335600 -2.03354500  
O 1.13661300 -2.72522900 -2.27389300  
C -1.65039300 -0.68824700 -2.23316900  
C -0.69804400 1.67348600 -2.38994700  
C 0.00000000 0.00000000 -4.42531400  
C 0.69804400 -1.67348600 -2.38994700  
C 1.65039300 0.68824700 -2.23316900  
Ag 0.00000000 0.00000000 0.00000000

[Ag{Fe(CO)<sub>5</sub>}<sub>2</sub>]<sup>+</sup> (*D*<sub>4</sub>, <sup>1</sup>A<sub>1</sub>)

E = -3808.935326 au

1 1

Ag 0.00000000 0.00000000 0.00000000  
Fe 0.00000000 0.00000000 2.59757300  
O 0.01810200 2.93804400 2.15667800  
O -2.93804400 0.01810200 2.15667800  
O 0.00000000 0.00000000 5.56894800  
O 2.93804400 -0.01810200 2.15667800  
O -0.01810200 -2.93804400 2.15667800  
C -1.80262300 0.01106900 2.31375400  
C 0.01106900 1.80262300 2.31375400  
C 0.00000000 0.00000000 4.42595000  
C -0.01106900 -1.80262300 2.31375400  
C 1.80262300 -0.01106900 2.31375400  
Fe 0.00000000 0.00000000 -2.59757300  
O 0.01810200 -2.93804400 -2.15667800

O 2.93804400 0.01810200 -2.15667800  
O 0.00000000 0.00000000 -5.56894800  
O -2.93804400 -0.01810200 -2.15667800  
O -0.01810200 2.93804400 -2.15667800  
C 1.80262300 0.01106900 -2.31375400  
C 0.01106900 -1.80262300 -2.31375400  
C 0.00000000 0.00000000 -4.42595000  
C -0.01106900 1.80262300 -2.31375400  
C -1.80262300 -0.01106900 -2.31375400

[Ag{Fe(CO)<sub>5</sub>}<sub>2</sub>]<sup>+</sup> (*D*<sub>4d</sub>, <sup>1</sup>A<sub>1</sub>)

E = -3808.935500 au

1 1

Ag 0.00000000 0.00000000 0.00000000  
Fe 0.00000000 0.00000000 2.59530900  
O 0.00000000 2.93756300 2.15148300  
O -2.93756300 0.00000000 2.15148300  
O 0.00000000 0.00000000 5.56665700  
O 2.93756300 0.00000000 2.15148300  
O 0.00000000 -2.93756300 2.15148300  
C -1.80230400 0.00000000 2.30982300  
C 0.00000000 1.80230400 2.30982300  
C 0.00000000 0.00000000 4.42372200  
C 0.00000000 -1.80230400 2.30982300  
C 1.80230400 0.00000000 2.30982300  
Fe 0.00000000 0.00000000 -2.59530900  
O 2.07717000 -2.07717000 -2.15148300  
O 2.07717000 2.07717000 -2.15148300  
O 0.00000000 0.00000000 -5.56665700  
O -2.07717000 -2.07717000 -2.15148300  
O -2.07717000 2.07717000 -2.15148300  
C 1.27442100 1.27442100 -2.30982300  
C 1.27442100 -1.27442100 -2.30982300  
C 0.00000000 0.00000000 -4.42372200  
C -1.27442100 1.27442100 -2.30982300  
C -1.27442100 -1.27442100 -2.30982300

[Au{Fe(CO)<sub>5</sub>}<sub>2</sub>]<sup>+</sup> (*D*<sub>4d</sub>, <sup>1</sup>A<sub>1</sub>)

E = -3797.716800 au

1 1

Fe 0.00000000 0.00000000 2.57784500



O 0.00000000 2.94036800 2.13439300  
 O -2.94036800 0.00000000 2.13439300  
 O 0.00000000 0.00000000 5.54788700  
 O 2.94036800 0.00000000 2.13439300  
 O 0.00000000 -2.94036800 2.13439300  
 C -1.80688800 0.00000000 2.29511700  
 C 0.00000000 1.80688800 2.29511700  
 C 0.00000000 0.00000000 4.40496700  
 C 0.00000000 -1.80688800 2.29511700  
 C 1.80688800 0.00000000 2.29511700  
 Fe 0.00000000 0.00000000 -2.57784500  
 O 2.07915400 -2.07915400 -2.13439300  
 O 2.07915400 2.07915400 -2.13439300  
 O 0.00000000 0.00000000 -5.54788700  
 O -2.07915400 -2.07915400 -2.13439300  
 O -2.07915400 2.07915400 -2.13439300  
 C 1.27766300 1.27766300 -2.29511700  
 C 1.27766300 -1.27766300 -2.29511700  
 C 0.00000000 0.00000000 -4.40496700  
 C -1.27766300 1.27766300 -2.29511700  
 C -1.27766300 -1.27766300 -2.29511700  
 Au 0.00000000 0.00000000 0.00000000

[Au{Fe(CO)<sub>5</sub>}<sub>2</sub>]<sup>+</sup> (*D*<sub>4</sub>, <sup>1</sup>A<sub>1</sub>)

E = -3797.716658 au

1 1

Fe 0.00000000 0.00000000 2.57919800  
 O 0.02038900 2.94112100 2.14100900  
 O -2.94112100 0.02038900 2.14100900  
 O 0.00000000 0.00000000 5.54980000  
 O 2.94112100 -0.02038900 2.14100900  
 O -0.02038900 -2.94112100 2.14100900  
 C -1.80733200 0.01250700 2.29964100  
 C 0.01250700 1.80733200 2.29964100  
 C 0.00000000 0.00000000 4.40687800  
 C -0.01250700 -1.80733200 2.29964100  
 C 1.80733200 -0.01250700 2.29964100  
 Fe 0.00000000 0.00000000 -2.57919800  
 O 0.02038900 -2.94112100 -2.14100900  
 O 2.94112100 0.02038900 -2.14100900  
 O 0.00000000 0.00000000 -5.54980000  
 O -2.94112100 -0.02038900 -2.14100900  
 O -0.02038900 2.94112100 -2.14100900  
 C 1.80733200 0.01250700 -2.29964100  
 C 0.01250700 -1.80733200 -2.29964100

|    |             |             |             |
|----|-------------|-------------|-------------|
| C  | 0.00000000  | 0.00000000  | -4.40687800 |
| C  | -0.01250700 | 1.80733200  | -2.29964100 |
| C  | -1.80733200 | -0.01250700 | -2.29964100 |
| Au | 0.00000000  | 0.00000000  | 0.00000000  |

**Figure S3.** Molecular structure and atom numbering scheme for  $[\text{Cu}\{\text{Fe}(\text{CO})_5\}_2[\text{SbF}_6]$ . There are two chemically similar molecules in the asymmetric unit.

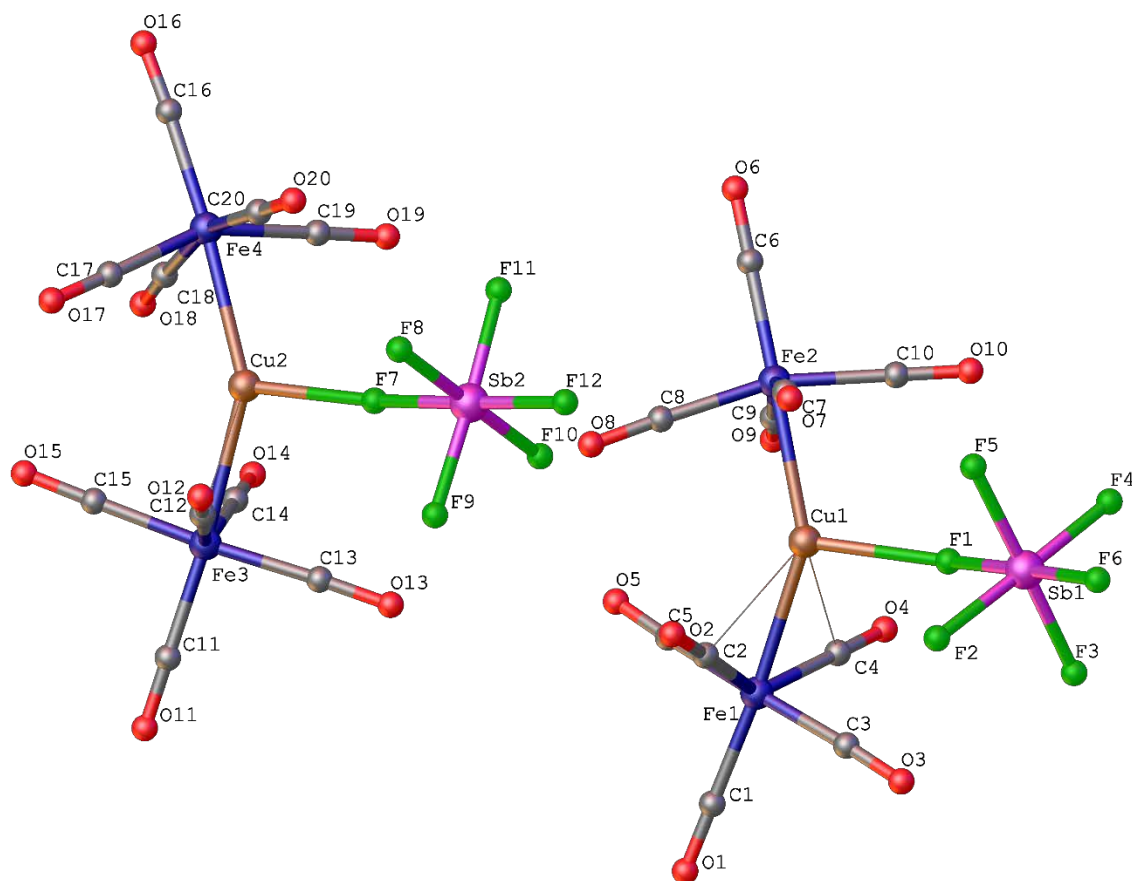

**Table S3.** Crystal data and structure refinement for [Cu{Fe(CO)<sub>5</sub>}<sub>2</sub>[SbF<sub>6</sub>].

|                                             |                                                                     |
|---------------------------------------------|---------------------------------------------------------------------|
| Identification code                         | RAD566                                                              |
| Empirical formula                           | C <sub>10</sub> CuF <sub>6</sub> Fe <sub>2</sub> O <sub>10</sub> Sb |
| Formula weight                              | 691.09                                                              |
| Temperature/K                               | 100.0                                                               |
| Crystal system                              | monoclinic                                                          |
| Space group                                 | P2 <sub>1</sub> /c                                                  |
| a/Å                                         | 13.6737(10)                                                         |
| b/Å                                         | 22.3624(17)                                                         |
| c/Å                                         | 13.0401(10)                                                         |
| α/°                                         | 90                                                                  |
| β/°                                         | 104.497(3)                                                          |
| γ/°                                         | 90                                                                  |
| Volume/Å <sup>3</sup>                       | 3860.4(5)                                                           |
| Z                                           | 8                                                                   |
| ρ <sub>calc</sub> /g/cm <sup>3</sup>        | 2.378                                                               |
| μ/mm <sup>-1</sup>                          | 4.047                                                               |
| F(000)                                      | 2608.0                                                              |
| Crystal size/mm <sup>3</sup>                | 0.42 × 0.32 × 0.035                                                 |
| Radiation                                   | MoKα (λ = 0.71073)                                                  |
| 2θ range for data collection/°              | 6.156 to 52.998                                                     |
| Index ranges                                | -17 ≤ h ≤ 17, -27 ≤ k ≤ 28, -16 ≤ l ≤ 16                            |
| Reflections collected                       | 18699                                                               |
| Independent reflections                     | 7849 [R <sub>int</sub> = 0.0512, R <sub>sigma</sub> = 0.0901]       |
| Data/restraints/parameters                  | 7849/0/541                                                          |
| Goodness-of-fit on F <sup>2</sup>           | 1.103                                                               |
| Final R indexes [I ≥ 2σ (I)]                | R <sub>1</sub> = 0.0695, wR <sub>2</sub> = 0.1535                   |
| Final R indexes [all data]                  | R <sub>1</sub> = 0.0981, wR <sub>2</sub> = 0.1712                   |
| Largest diff. peak/hole / e Å <sup>-3</sup> | 1.50/-1.84                                                          |

**Figure S4.** Molecular structure and atom numbering scheme for  $[\text{Ag}\{\text{Fe}(\text{CO})_5\}_2][\text{SbF}_6]$ .

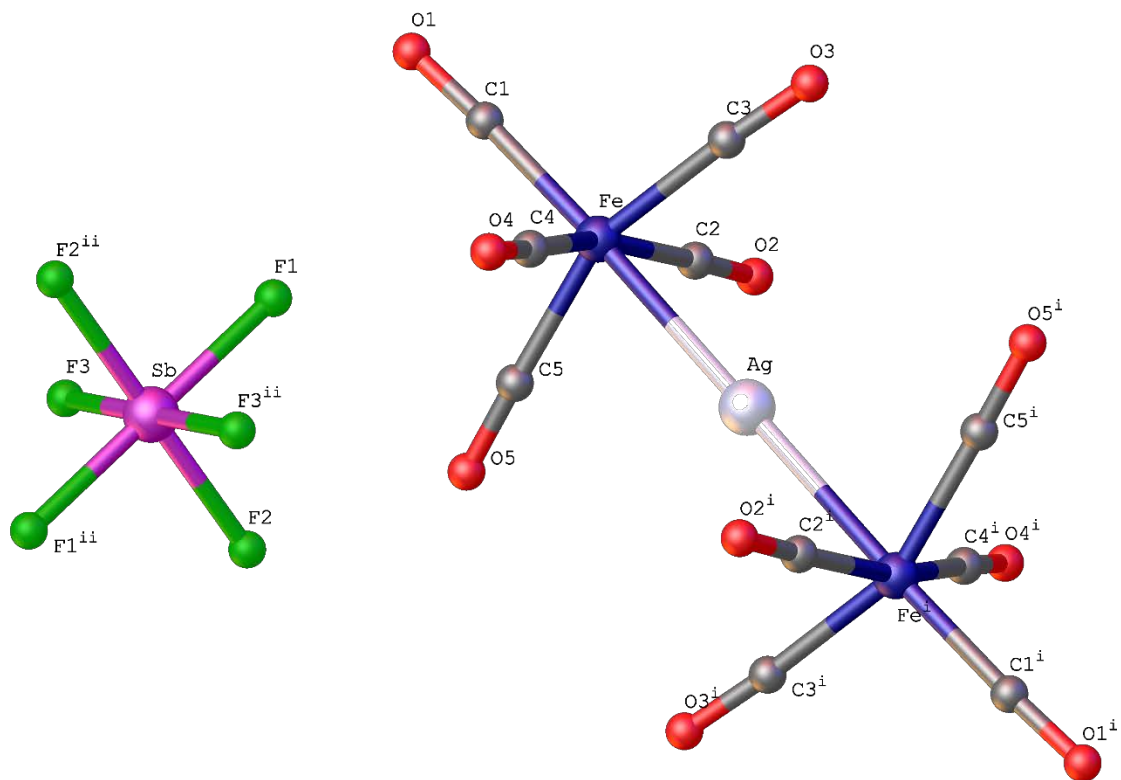

**Table S4.** Crystal data and structure refinement for [Ag{Fe(CO)<sub>5</sub>}<sub>2</sub>][SbF<sub>6</sub>].

|                                             |                                                                     |
|---------------------------------------------|---------------------------------------------------------------------|
| Identification code                         | RAD562                                                              |
| Empirical formula                           | C <sub>10</sub> AgF <sub>6</sub> Fe <sub>2</sub> O <sub>10</sub> Sb |
| Formula weight                              | 735.42                                                              |
| Temperature/K                               | 100.0                                                               |
| Crystal system                              | monoclinic                                                          |
| Space group                                 | P2 <sub>1</sub> /n                                                  |
| a/Å                                         | 6.3841(5)                                                           |
| b/Å                                         | 12.6173(9)                                                          |
| c/Å                                         | 11.3212(8)                                                          |
| α/°                                         | 90                                                                  |
| β/°                                         | 90.429(3)                                                           |
| γ/°                                         | 90                                                                  |
| Volume/Å <sup>3</sup>                       | 911.90(12)                                                          |
| Z                                           | 2                                                                   |
| ρ <sub>calc</sub> /g/cm <sup>3</sup>        | 2.678                                                               |
| μ/mm <sup>-1</sup>                          | 4.191                                                               |
| F(000)                                      | 688.0                                                               |
| Crystal size/mm <sup>3</sup>                | 0.21 × 0.17 × 0.1                                                   |
| Radiation                                   | MoKα (λ = 0.71073)                                                  |
| 2θ range for data collection/°              | 6.458 to 56.702                                                     |
| Index ranges                                | -8 ≤ h ≤ 8, -16 ≤ k ≤ 16, -15 ≤ l ≤ 15                              |
| Reflections collected                       | 6850                                                                |
| Independent reflections                     | 2265 [R <sub>int</sub> = 0.0194, R <sub>sigma</sub> = 0.0232]       |
| Data/restraints/parameters                  | 2265/0/139                                                          |
| Goodness-of-fit on F <sup>2</sup>           | 1.090                                                               |
| Final R indexes [I >= 2σ (I)]               | R <sub>1</sub> = 0.0234, wR <sub>2</sub> = 0.0561                   |
| Final R indexes [all data]                  | R <sub>1</sub> = 0.0286, wR <sub>2</sub> = 0.0590                   |
| Largest diff. peak/hole / e Å <sup>-3</sup> | 0.62/-1.19                                                          |

**Figure S5.** Molecular structure and atom numbering scheme for  $[\text{Au}\{\text{Fe}(\text{CO})_5\}_2][\text{HOB}\{3,5\text{-(CF}_3)_2\text{C}_6\text{H}_3\}_3]$ .

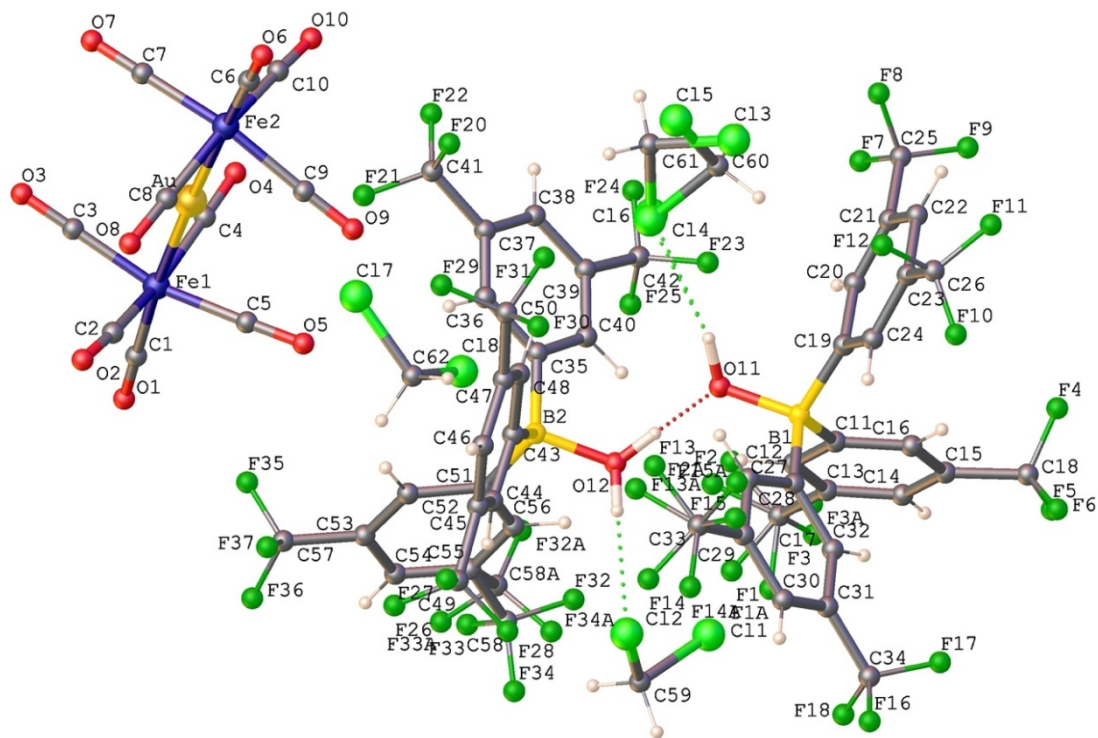

**Table S5.** Crystal data and structure refinement for [Au{Fe(CO)<sub>5</sub>}<sub>2</sub>][HOB{3,5-(CF<sub>3</sub>)<sub>2</sub>C<sub>6</sub>H<sub>3</sub>}<sub>3</sub>]•[H<sub>2</sub>OB{3,5-(CF<sub>3</sub>)<sub>2</sub>C<sub>6</sub>H<sub>3</sub>}<sub>3</sub>]•2.5(CH<sub>2</sub>Cl<sub>2</sub>).

|                                             |                                                                                                                    |
|---------------------------------------------|--------------------------------------------------------------------------------------------------------------------|
| Identification code                         | Rad785                                                                                                             |
| Empirical formula                           | C <sub>60.5</sub> H <sub>26</sub> AuB <sub>2</sub> Cl <sub>5</sub> F <sub>36</sub> Fe <sub>2</sub> O <sub>12</sub> |
| Formula weight                              | 2136.35                                                                                                            |
| Temperature/K                               | 100.0                                                                                                              |
| Crystal system                              | monoclinic                                                                                                         |
| Space group                                 | P2 <sub>1</sub> /n                                                                                                 |
| a/Å                                         | 12.7265(14)                                                                                                        |
| b/Å                                         | 41.135(4)                                                                                                          |
| c/Å                                         | 14.3567(15)                                                                                                        |
| α/°                                         | 90                                                                                                                 |
| β/°                                         | 92.702(2)                                                                                                          |
| γ/°                                         | 90                                                                                                                 |
| Volume/Å <sup>3</sup>                       | 7507.4(14)                                                                                                         |
| Z                                           | 4                                                                                                                  |
| ρ <sub>calc</sub> /cm <sup>3</sup>          | 1.890                                                                                                              |
| μ/mm <sup>-1</sup>                          | 2.655                                                                                                              |
| F(000)                                      | 4140.0                                                                                                             |
| Crystal size/mm <sup>3</sup>                | 0.48 × 0.35 × 0.05                                                                                                 |
| Radiation                                   | MoKα (λ = 0.71073)                                                                                                 |
| 2θ range for data collection/°              | 4.626 to 54.968                                                                                                    |
| Index ranges                                | -16 ≤ h ≤ 16, -53 ≤ k ≤ 53, -18 ≤ l ≤ 18                                                                           |
| Reflections collected                       | 140822                                                                                                             |
| Independent reflections                     | 17218 [R <sub>int</sub> = 0.0717, R <sub>sigma</sub> = 0.0424]                                                     |
| Data/restraints/parameters                  | 17218/238/1203                                                                                                     |
| Goodness-of-fit on F <sup>2</sup>           | 1.226                                                                                                              |
| Final R indexes [I ≥ 2σ (I)]                | R <sub>1</sub> = 0.0821, wR <sub>2</sub> = 0.1662                                                                  |
| Final R indexes [all data]                  | R <sub>1</sub> = 0.0913, wR <sub>2</sub> = 0.1703                                                                  |
| Largest diff. peak/hole / e Å <sup>-3</sup> | 1.62/-4.92                                                                                                         |



## References

- <sup>1</sup> a) Becke, A. D. *Phys. Rev. A* **1988**, *38*, 3098–3100; (b) Perdew, J. P. *Phys. Rev. B* **1986**, *33*, 8822–8824; (c) Grimme, S.; Ehrlich, S.; Goerigk, L. *J. Comput. Chem.* **2011**, *32*, 1456–1465; (d) Grimme, S.; Antony, J.; Ehrlich, S.; Krieg, H. *J. Chem. Phys.* **2010**, *132*, 154104; (e) Weigend, F.; Ahlrichs, R. *Phys. Chem. Chem. Phys.* **2005**, *7*, 3297–3305; (f) Weigend, F. *Phys. Chem. Chem. Phys.* **2006**, *8*, 1057–1065.
- <sup>2</sup> Gaussian 16, Revision A.03, Frisch, M. J. et al. Gaussian, Inc., Wallingford CT (2016).
- <sup>3</sup> a) F. Weinhold, C. Landis, Valency and Bonding, A Natural Bond Orbital Donor – Acceptor Perspective, Cambridge University Press, Cambridge, 2005; b) C. R. Landis and F. Weinhold, "The NBO View of Chemical Bonding", in, G. Frenking and S. Shaik (eds.), The Chemical Bond: Fundamental Aspects of Chemical Bonding (Wiley, 2014), pp. 91-120.
- <sup>4</sup> E. D. Glendening, C. R. Landis, F. Weinhold, *J. Comput. Chem.* **2013**, *34*, 1429.
- <sup>5</sup> R. F. W. Bader, *Atoms in Molecules: A Quantum Theory*, 1990, Oxford: Clarendon Press.
- <sup>6</sup> AIMAll (Version 17.11.14), T. A. Keith, TK Gristmill Software, Overland Park KS, USA, 2017.
- <sup>7</sup> P. Pollak, F. Weigend, *J. Chem. Theory Comput.*, **2017**, *13*, 3696-3705.
- <sup>8</sup> Ziegler, T.; Rauk, A. *Theor. Chim. Acta*, **1977**, *46*, 1–10.
- <sup>9</sup> a) Mitoraj, M.; Michalak, A. *Organometallics* **2007**, *26*, 6576–6580; b) Mitoraj, M.; Michalak, A. *J. Mol. Model.* **2008**, *14*, 681–687.
- <sup>10</sup> a) ADF2017, SCM, Theoretical Chemistry, Vrije Universiteit, Amsterdam, The Netherlands, <http://www.scm.com>; b) G. te Velde, F. M. Bickelhaupt, E. J. Baerends, C. F. Guerra, S. J. A. van Gisbergen, J. G. Snijders, T. Ziegler, *J. Comput. Chem.* **2001**, *22*, 931–967.
- <sup>11</sup> a) E. van Lenthe, E. J. Baerends, *J. Comput. Chem.* **2003**, *24*, 1142-1156; b) E. van Lenthe, E. J. Baerends, J. G. Snijders, *J. Chem. Phys.* **1993**, *99*, 4597; c) E. van Lenthe, E. J. Baerends, J. G. Snijders, *J. Chem. Phys.* **1994**, *101*, 9783.
- <sup>12</sup> a) G. Frenking, F. M. Bickelhaupt, *The Chemical Bond I. Fundamental Aspects of Chemical Bonding*, chap. The EDA Perspective of Chemical Bonding, 121–158. Wiley-VCH: Weinheim (2014); b) L. Zhao, M. von Hopffgarten, D. M. Andrada, G. Frenking, *WIREs Comput. Mol. Sci.* **2018**, *8*, 1345; c) L. Zhao, M. Hermann, M.; W.H.E. Schwarz, G. Frenking, *Nat. Rev. Chem.* **2019**, *3*, 48-63; d) L. Zhao, S. Pan, N. Holzmann, P. Schwerdtfeger, G. Frenking, *Chem. Rev.* **2019**, *119*, 8781-8845.
- <sup>13</sup> a) M. Fianchini, C. F. Campana, B. Chilukuri, T. R. Cundari, V. Petricek, H. V. R. Dias, *Organometallics* **2013**, *32*, 3034-3041; b) H. V. R. Dias, M. Fianchini, T. R. Cundari, C. F. Campana, *Angew. Chem., Int. Ed.* **2008**, *47*, 556-559.
- <sup>14</sup> L. Krause, R. Herbst-Irmer, G. M. Sheldrick, D. Stalke, *J. Appl. Crystallogr.* **2015**, *48*, 3-10.
- <sup>15</sup> G. M. Sheldrick, *Acta Crystallogr. Sect. A: Found. Adv.* **2015**, *71*, 3-8.

- 
- <sup>16</sup> G. M. Sheldrick, *Acta Crystallogr. Sect. C: Struct. Chem.* **2015**, *71*, 3-8.
- <sup>17</sup> O. V. Dolomanov, L. J. Bourhis, R. J. Gildea, J. A. K. Howard, H. Puschmann, *J. Appl. Crystallogr.* **2009**, *42*, 339-341.
